# Supplementary material for: Prevalence of Essential Nutrient Supplement Use and Assessment of the Knowledge and Attitudes of Lebanese Mothers towards Dietary Supplement Practices in Maternal, Infancy and Preschool Ages: Findings of a National Representative Cross-Sectional Study
Source: MDPI journal article supplement (doi:10.3390/foods11193005), 2022-09-27
Supplement: s1 [file s1]

**Table S1.** Mothers' knowledge, attitudes, and practices related to oral dietary supplementation.

| Statement                                                                                                               | Mothers<br>(N=511)<br>n (%) |
|-------------------------------------------------------------------------------------------------------------------------|-----------------------------|
| <b>Knowledge</b>                                                                                                        |                             |
| HPs can cause adverse effects when consumed with drugs                                                                  |                             |
| No                                                                                                                      | 382 (74.7)                  |
| Yes                                                                                                                     | 129 (25.3)                  |
| HPs are safe because they are from natural sources<br>(N=509 mothers)                                                   |                             |
| No                                                                                                                      | 163 (32.0)                  |
| Yes                                                                                                                     | 346 (68.0)                  |
| The effectiveness of DSs should be based on clinical trials                                                             |                             |
| No                                                                                                                      | 242 (47.4)                  |
| Yes                                                                                                                     | 269 (52.6)                  |
| DSs available at pharmacies are pretested for their safety (n=511 mothers)                                              |                             |
| No                                                                                                                      | 341 (66.7)                  |
| Yes                                                                                                                     | 170 (33.3)                  |
| <b>Attitudes</b>                                                                                                        | <b>n (%)</b>                |
| DSs are necessary to maintain good health (n=502 mothers)                                                               |                             |
| Agree                                                                                                                   | 311 (61.9)                  |
| Disagree                                                                                                                | 191 (38.1)                  |
| DSs help fight infections by strengthening immunity (n=504 mothers)                                                     |                             |
| Agree                                                                                                                   | 295 (58.5)                  |
| Disagree                                                                                                                | 209 (41.5)                  |
| Food nutrients are sufficient to meet dietary requirements with no need for DSs (n=509 mothers)                         |                             |
| Agree                                                                                                                   | 219 (43.0)                  |
| Disagree                                                                                                                | 290 (57.0)                  |
| DSs' consumption could cause health adverse effects (n=505 mothers)                                                     |                             |
| Agree                                                                                                                   | 128 (25.4)                  |
| Disagree                                                                                                                | 377 (74.6)                  |
| DSs may mitigate the negative effects associated with smoking, alcohol consumption, and being sedentary (n=510 mothers) |                             |
| Agree                                                                                                                   | 67 (13.2)                   |
| Disagree                                                                                                                | 443 (86.8)                  |
| <b>Practices</b>                                                                                                        | <b>n (%)</b>                |
| Use of DSs                                                                                                              |                             |
| Yes                                                                                                                     | 242 (47.4)                  |
| No                                                                                                                      | 269 (52.6)                  |
| Type of supplement (n=242; supplement users)                                                                            |                             |
| Vitamin D                                                                                                               | 163 (82)                    |
| Iron                                                                                                                    | 162 (67)                    |
| Calcium                                                                                                                 | 148 (61)                    |
| Multivitamin                                                                                                            | 136 (56)                    |
| Magnesium                                                                                                               | 114 (47)                    |

|                                                             |            |
|-------------------------------------------------------------|------------|
| Vitamin C                                                   | 99 (41)    |
| Vitamin B12                                                 | 75 (31)    |
| Zinc                                                        | 73 (30)    |
| Vitamin B6 (pyridoxine)                                     | 73 (30)    |
| Folic acid                                                  | 70 (29)    |
| Vitamin E                                                   | 46 (19)    |
| Vitamin B1 (thiamin)                                        | 46 (19)    |
| Vitamin A                                                   | 44 (18)    |
| Vitamin B2 (riboflavin)                                     | 39 (16)    |
| Iodine                                                      | 39 (16)    |
| Niacin                                                      | 36 (15)    |
| Phosphorus                                                  | 36 (15)    |
| Choline                                                     | 31 (13)    |
| Selenium                                                    | 31 (13)    |
| Looking over the DS's label before using it (n=242 mothers) |            |
| Most of the time                                            | 126 (52.0) |
| Occasionally                                                | 56 (23.1)  |
| Rarely                                                      | 44 (18.1)  |
| Never                                                       | 16 (6.6)   |
| DSs are prescribed by (n=242 mothers)                       |            |
| Physician                                                   | 204 (84.2) |
| Dietitian                                                   | 11 (4.5)   |
| Coach (trainer)                                             | 3 (1.2)    |
| Friend                                                      | 1 (0.4)    |
| Own willing (self-decision)                                 | 23 (9.5)   |
| DSs are purchased from (n=242 mothers)                      |            |
| Pharmacy                                                    | 232 (95.9) |
| Nutrition supplements store                                 | 7 (2.9)    |
| Online purchase                                             | 3 (1.2)    |
| Supplement's form (n=242 mothers)                           |            |
| Pills                                                       | 234 (96.6) |
| Drinks                                                      | 8 (3.3)    |
| Money spent per month on purchasing DSs (n=239 mothers)     |            |
| Less than 50,000 L.L.                                       | 64 (26.7)  |
| 50,000-100,000 L.L.                                         | 117 (48.9) |
| 100,000-200,000 L.L.                                        | 45 (18.8)  |
| More than 200,000 L.L.                                      | 13 (5.4)   |
| Adverse effects experienced after DSs use (n=242)           |            |
| Tachycardia                                                 | 4 (1.7)    |
| Nausea, with or without vomiting                            | 7 (2.9)    |
| Stomach pain                                                | 6 (2.5)    |
| Headache                                                    | 4 (1.7)    |
| Dizziness and confusion                                     | 1 (0.4)    |
| Chronic constipation                                        | 7 (2.9)    |
| Skin itching                                                | 2 (0.8)    |

**Table S2.** Practices related to oral dietary supplementation among under- 5 children in this study.

| Practices                                                                              | Overall<br>(N=511) |      | Boys<br>(n=230) |      | Girls<br>(n= 281) |      | <i>p</i> -<br>Value |
|----------------------------------------------------------------------------------------|--------------------|------|-----------------|------|-------------------|------|---------------------|
|                                                                                        | N                  | %    | n               | %    | n                 | %    |                     |
| Use of DSs                                                                             |                    |      |                 |      |                   |      |                     |
| Yes                                                                                    | 329                | 64.4 | 157             | 68.3 | 172               | 61.2 | 0.01*               |
| No                                                                                     | 182                | 35.6 | 73              | 31.7 | 109               | 38.8 |                     |
| Type of supplement (n=329; supplement users)                                           |                    |      |                 |      |                   |      |                     |
| Single vitamin/or mineral                                                              | 153                | 46.6 | 78              | 49.6 | 75                | 43.8 | 0.34                |
| Multi-vitamin-mineral                                                                  | 110                | 33.2 | 53              | 33.5 | 57                | 33   |                     |
| Single vitamin/or mineral and multi-vitamin-mineral                                    | 66                 | 20.2 | 27              | 16.9 | 39                | 23.2 |                     |
| The DSs are prescribed for the child by (n=329; supplement users)                      |                    |      |                 |      |                   |      |                     |
| Physician                                                                              | 315                | 95.7 | 150             | 95.7 | 165               | 95.3 | 0.58                |
| Pharmacist                                                                             | 13                 | 4.0  | 7               | 4.3  | 6                 | 3.6  |                     |
| Mothers' own willing                                                                   | 1                  | 0.3  | 0               | 0    | 1                 | 0.8  |                     |
| Reasons that led mothers to supplement their children's diet (n=329; supplement users) |                    |      |                 |      |                   |      |                     |
| Keep the child healthy                                                                 | 197                | 59.8 | 84              | 53.5 | 113               | 66.1 | 0.17                |
| Food nutrients are not enough to meet child's dietary needs                            | 100                | 30.5 | 57              | 36.3 | 43                | 25.1 | 0.04*               |
| The child has a health problem that necessitates DSs use                               | 32                 | 9.7  | 16              | 10.2 | 15                | 8.8  | 0.80                |

\*significant at *p*-value <0.05 for  $\chi^2$  test.
